# Supplementary material for: Vitamin D deficiency in critically ill children: a systematic review and meta-analysis
Source: Springer Nature journal article supplement (doi:10.1186/s13054-017-1875-y), 2017-11-23
Supplement: MOESM5 [file 15249298]

**Supplemental Digital Content 5: Comparison of Vitamin D status at PICU admission (or first day in PICU) for critically ill children and healthy controls**

| Trial, Year                   | Threshold VDD (nmol/L) | %VDD | PICU cohort                           |                   | Control cohort |                                       |                                | 95 %CI (UL, LL)     | P value      |
|-------------------------------|------------------------|------|---------------------------------------|-------------------|----------------|---------------------------------------|--------------------------------|---------------------|--------------|
|                               |                        |      | Average 25(OH)D (nmol/L) <sup>b</sup> | (n <sup>a</sup> ) | %VDD           | Average 25(OH)D (nmol/L) <sup>b</sup> | Difference in 25(OH)D (nmol/L) |                     |              |
| Gauthier, 1990                | 22.5                   | NR   | 66.8 <sup>c</sup> (±20)               | 12                | NR             | 82.5 <sup>c</sup> (±25)               | -15.7                          | -33.8, 2.4          | 0.09         |
| Hebbar, 2014                  | 50                     | 61   | 59 <sup>c</sup> (±43)                 | 42                | 23.9           | 99 <sup>c</sup> (±55)                 | -40                            | -58.57, -21.4       | 0.000        |
| Rey, 2014                     | 50                     | 30   | 65 (48 – 89.5)                        | 289               | 16%            | 76.3 (58-96.5)                        | -19.5                          | -25.2, -13.8        | 0.000        |
| Korwutthikulrangsri, 2015     | 50                     | 78   | 41.5 (33.3-48.8)                      | 36                | 19.5           | 61 <sup>c</sup> (±12)                 | -19.0                          | -30.4, -7.62        | 0.000        |
| Onwuneme, 2015                | 50                     | 59   | 47 <sup>c</sup> (±29)                 | 30                | NR             | 66 <sup>c</sup> (±26)                 | -19.8                          | -27.5, -12.0        | 0.001        |
| Ponnarmeni, 2016              | 50                     | 51   | 49.25 (±30)                           | 338               | 40.2%          | 68.7 <sup>c</sup> (±40)               | -11.3                          | -17.0, -5.6         | 0.000        |
| <b>Pooled Mean Difference</b> |                        |      |                                       |                   |                |                                       | <b>-17.3</b>                   | <b>-14.0, -20.6</b> | <b>0.000</b> |

<sup>a</sup>Total number of enrolled patients, by group, for which a measure of vitamin D status was available. <sup>b</sup>Reported as median, unless otherwise specified as mean<sup>c</sup>. Distribution reported as either IQR (XX-XX) or Standard Deviation (±XX). 25(OH)D = 25 hydroxyvitamin D; CI = Confidence Interval; NR = Not reported; PICU = Pediatric Intensive Care Unit; VDD = Vitamin D deficiency. <sup>c</sup>Data provided by authors outside of publication.
