# Supplementary material for: Vitamin D deficiency in critically ill children: a systematic review and meta-analysis
Source: Springer Nature journal article supplement (doi:10.1186/s13054-017-1875-y), 2017-11-23
Supplement: MOESM6 [file 15249298]

**Supplemental Digital Content 6: Demographics and risk factors evaluated in each study**

| Study name<br>(First author, year) | Weight<br>Nutrition | Bone | Renal | Liver | Malabsorption | Age | Admission<br>type | Vitamin D<br>Supplement | Race,<br>skin color | Season | Preexisting<br>disease |
|------------------------------------|---------------------|------|-------|-------|---------------|-----|-------------------|-------------------------|---------------------|--------|------------------------|
| Gauthier, 1990                     |                     |      | EC    |       |               | No  |                   |                         |                     |        |                        |
| Madden, 2012                       | No                  |      |       |       |               | Yes | No                | Yes                     | Yes                 | Yes    | No                     |
| McNally, 2012                      | Yes                 |      |       | No    |               | No  | Yes               |                         |                     | No     | No                     |
| Rippel, 2012                       |                     | EC   | EC    | EC    |               | No  | Yes               |                         | No                  | No     |                        |
| Ayulo, 2014                        | Yes                 |      |       |       |               | Yes | No                |                         | Yes                 | No     |                        |
| Dayal, 2014                        | Yes                 | No   | EC    | EC    | EC            | No  | No                | No                      | No                  |        | No                     |
| Hebbar, 2014                       |                     |      | EC    |       | EC            | No  |                   |                         | Yes                 | Yes    | No                     |
| Rey, 2014                          | Yes                 |      |       |       |               | Yes | Yes               |                         |                     |        | No                     |
| Korwutthikulrangsri, 2015          |                     |      |       | EC    |               | No  | No                | No                      |                     |        | No                     |
| Onwuneme, 2015                     | No                  |      |       |       |               | No  |                   | Yes                     |                     | No     | No                     |
| Prasad, 2015                       | No                  |      |       |       |               | No  |                   |                         |                     | No     |                        |
| Ebenezer, 2016                     | No                  |      |       |       |               | Yes | No                |                         | No                  | No     | No                     |
| Ponnarmeni, 2016                   | Yes                 |      |       |       |               | No  |                   |                         |                     | No     | EC                     |
| Bustos, 2016                       | No                  |      | EC    | EC    |               | No  | No                |                         |                     | Yes    | No                     |
| Garcia-Soler, 2016                 | Yes                 |      | EC    |       | EC            | Yes | Yes               | EC                      | Yes                 | Yes    | No                     |
| Sankar, 2016                       | No                  | EC   | EC    |       |               | No  | No                | EC                      |                     |        |                        |
| Shah, 2016                         | No                  | EC   | EC    |       |               | Yes | No                |                         |                     | Yes    | No                     |

A blank entry means that the study did not evaluate for a relationship between vitamin D status and that patient characteristics. Yes = Statistically significant relationship observed in at least one analyses. No = Statistical relationship not observed. Abbreviations: EC = Was part of exclusion criteria
