# Supplementary material for: Vitamin D deficiency in critically ill children: a systematic review and meta-analysis
Source: Crit Care. 2017 Nov 23;21:287. doi: 10.1186/s13054-017-1875-y (PMC5701429; doi:10.1186/s13054-017-1875-y)
Supplement: Supplementary file 3 — Table summarizing the screening criteria used for level 1 and level 2 screening. (PDF 165 kb) [file 13054_2017_1875_MOESM3_ESM.pdf]

**Supplemental Digital Content 3: Level 1 and Level 2 screening criteria**

| <b>Level 1 (Article may be excluded if it is)</b> |                                                                                                                                                                                                                                                                                                                                                                                                                                                                                                                                                                                                                                                                                                                           |
|---------------------------------------------------|---------------------------------------------------------------------------------------------------------------------------------------------------------------------------------------------------------------------------------------------------------------------------------------------------------------------------------------------------------------------------------------------------------------------------------------------------------------------------------------------------------------------------------------------------------------------------------------------------------------------------------------------------------------------------------------------------------------------------|
| 1                                                 | <ul style="list-style-type: none"><li>• A review article, letter, editorial</li><li>• A systematic review</li><li>• Surveys</li><li>• Interventional study</li><li>• Study population is animal or cell line</li><li>• Study population has a specific genetic based disease</li><li>• Study describes less than 10 patients</li><li>• There is no mention of vitamin D levels, vitamin D status or vitamin D deficiency in the abstract (exclude those that only mention vitamin D binding protein or vitamin D receptors)</li><li>• No mention of critical illness, intensive care, mortality/death, mechanical ventilation, cardiovascular support (vasopressors, inotrope score, ECMO, etc) in the abstract</li></ul> |
| <b>Level 2 (article should be excluded if)</b>    |                                                                                                                                                                                                                                                                                                                                                                                                                                                                                                                                                                                                                                                                                                                           |
| 2                                                 | <ul style="list-style-type: none"><li>• Does not include children (<math>\leq 18</math> years)</li><li>• Includes children over 21 years but does not report data separately for children</li></ul>                                                                                                                                                                                                                                                                                                                                                                                                                                                                                                                       |
| 3                                                 | <ul style="list-style-type: none"><li>• No patients admitted to PICU</li></ul>                                                                                                                                                                                                                                                                                                                                                                                                                                                                                                                                                                                                                                            |
| 4                                                 | Does not report on vitamin D status using 25OHD level<br>Vitamin D levels were measured prior to death (e.g. does not represent a SIDS or related syndrome where patients were dead)                                                                                                                                                                                                                                                                                                                                                                                                                                                                                                                                      |
| 5                                                 | <ul style="list-style-type: none"><li>• Does not report on one or more of the following ICU outcomes<ul style="list-style-type: none"><li>○ Mortality (PICU or hospital)</li><li>○ Mechanical ventilation (e.g. intubation, duration of MV)</li><li>○ Vasoactive agent use (e.g. inotrope score, catecholamines, vasopressors)</li><li>○ PICU Illness severity score (e.g. PRISM, PELOD, PIM)</li></ul></li></ul>                                                                                                                                                                                                                                                                                                         |
| 6                                                 | <ul style="list-style-type: none"><li>• Study type other than observational cohort or case control study</li></ul>                                                                                                                                                                                                                                                                                                                                                                                                                                                                                                                                                                                                        |
| 7                                                 | <ul style="list-style-type: none"><li>• Meets above, but enrolled a specific disease process or surgical procedure (ALRI, Cardiac surgery, prematurity)</li></ul>                                                                                                                                                                                                                                                                                                                                                                                                                                                                                                                                                         |

PICU – pediatric intensive care unit; ECMO – Extracorporeal membrane oxygenation; SIDS – sudden infant death syndrome; ICU – intensive care unit; MV – mechanical ventilation; PRISM – Pediatric Risk of Mortality; PELOD - Pediatric Logistic Organ Dysfunction; PIM –Pediatric Risk of Mortality; ALRI – Acute lower respiratory infection
